# Supplementary material for: A Neuro-Mechanical Model of a Single Leg Joint Highlighting the Basic Physiological Role of Fast and Slow Muscle Fibres of an Insect Muscle System
Source: PubMed Central journal article supplement (PMC3823925; doi:10.1371/journal.pone.0078247), 2013-11-11
Supplement: pone.0078247.s001.pdf [file pone.0078247.s001.pdf]

## Appendix S1: Equations of the neuron models

### CPG-neurons and interneurons

The constituent currents are

$I_{NaP}$ : slowly inactivating Na- current;

$I_L$ : leakage current;

$I_{syn}$ : synaptic current from other neurons;

$I_{app}$ : input current (e.g. from sense organs or from the brain).

The model equations read:

$$C_m dV/dt = -(I_{NaP} + I_L + I_{syn} + I_{app}) \quad \text{with} \quad (1)$$

$$I_{NaP} = g_{NaP} m_\infty(V) h(V - E_{Na}) \quad (2)$$

$$I_L = g_L(V - E_L) \quad (3)$$

$$I_{syn} = g_{syn} s_\infty(V_{syn})(V - E_{syn}) \quad (4)$$

$$I_{app} = g_{app}(V - E_{app}) \quad \text{and} \quad (5)$$

$$dh/dt = (h_\infty(V) - h)/\tau_h(V). \quad (6)$$

The membrane potential  $V(t)$  and the inactivation variable  $h(t)$  of  $I_{NaP}$  are the model variables, both are functions of time. The function  $m_\infty(V)$  is the steady-state value at  $V$  of the activation variable  $m$  of  $I_{NaP}$ , and  $h_\infty(V)$  is the steady-state value (at  $V$ ) of  $h$ . In eqn. 4, the function  $s_\infty(V_{syn})$  is the actual value of the synaptic activation induced by *another* cell with membrane potential  $V_{syn}$ . All of these voltage functions have the same form:

$$z_\infty(V) = 1/(1 + \exp(\gamma_z(V - V_{hz}))) \quad (7)$$

where  $z = m, h, s$ , while the formula for 'time constant'  $\tau_h(V)$  reads

$$\tau_h(V) = \frac{1}{\epsilon} \frac{1}{\cosh(\gamma_\tau(V - V_{\tau h}))}. \quad (8)$$

The coefficients  $g_x$  in eqns. 2-5 are the maximal conductances of the membrane currents, and the parameters  $E_x$  the corresponding reversal potentials;  $C_m$  is the membrane capacitance.

## Motoneurons

The constituent currents are:

$I_{Na}$ : fast inactivating Na-current of the action potential;

$I_K$ : delayed rectifier K-current of the action potential;

$I_q$ : 'adaptation' (K-)current;

$I_L$ : leakage current;

$I_{syn}$ : synaptic current from other neurons;

$I_{app}$ : input current (e.g. from sense organs or from the brain).

The current balance equation reads:

$$C_m dV/dt = -(I_{Na} + I_K + I_q + I_L + I_{syn} + I_{app}) \quad (9)$$

The individual membrane currents are of the form:

$$I_x = g_x m_x^p h_x (V - E_x). \quad (10)$$

where  $x = Na, K, q, L$  ( $I_{syn}$  and  $I_{app}$  are of the same form as in the CPG neuron model: eqns. 4, 5). The parameters  $g_x$  and  $E_x$  have the same meaning as before (see preceding section). The parameter  $p$  is an integer. The (in)activation variables  $h_x$  and  $m_x$ , respectively, obey a differential equation of the form:

$$dy/dt = \alpha_y(V)(1 - y) - \beta_y(V)y \quad (11)$$

where  $y$  stands for  $h_x$  or  $m_x$ . The coefficients of eqn. 11 are nonlinear functions of the membrane potential  $V$ . They can have different forms depending on the type of the membrane current. The specific  $\alpha(V)$  and  $\beta(V)$  functions are listed below for each individual current type.

**$I_{Na}$  current** $m_{Na}$ :

$$\alpha_{m_{Na}}(V) = \frac{a_{m1}(a_{m2} - V)}{\exp(a_{m3}(a_{m2} - V)) - 1} \quad (12)$$

$$\beta_{m_{Na}}(V) = \frac{b_{m1}(b_{m2} - V)}{\exp(b_{m3}(b_{m2} - V)) - 1} \quad (13)$$

 $h_{Na}$ :

$$\alpha_{h_{Na}}(V) = a_{h1} \exp(a_{h3}(a_{h2} - V)) \quad (14)$$

$$\beta_{h_{Na}}(V) = \frac{b_{h1}}{\exp(b_{h3}(b_{h2} - V)) + 1} \quad (15)$$

 **$I_K$  current** $m_K$ :

$$\alpha_{m_K}(V) = \frac{a_{m1}(a_{m2} - V)}{\exp(a_{m3}(a_{m2} - V)) - 1} \quad (16)$$

$$\beta_{m_K}(V) = b_{m1} \exp(b_{m3}(b_{m2} - V)) \quad (17)$$

**Adaptation current  $I_q$** 

$$m_{q\infty} = \frac{1}{1 + \exp(s_q(V - V_{hq}))} \quad (18)$$

$$r_q = \text{const.} \quad (19)$$

$$\alpha_{m_K}(V) = m_{q\infty} r_q \quad (20)$$

$$\beta_{m_K}(V) = (1 - m_{q\infty}) r_q \quad (21)$$

where  $m_{q\infty}$  is the steady-state value of  $m_q$  at a given value of  $V$  and  $r_q$  is the rate constant. For further details see [1, 2].

## References

1. Daun S, Rybak IA, Rubin J (2009) The response of a half-center oscillator to external drive depends on the intrinsic dynamics of its components: a mechanistic analysis. *J Comput Neurosci* 27: 3-36.
2. Daun-Gruhn S, Toth TI (2011) An inter-segmental network model and its use in elucidating gait-switches in the stick insect. *J Comput Neurosci* 31: 43-60.
