# Supplementary material for: A Neuro-Mechanical Model of a Single Leg Joint Highlighting the Basic Physiological Role of Fast and Slow Muscle Fibres of an Insect Muscle System
Source: PubMed Central journal article supplement (PMC3823925; doi:10.1371/journal.pone.0078247), 2013-11-11
Supplement: pone.0078247.s002.pdf [file pone.0078247.s002.pdf]

## Appendix S2: Equation of mechanical motion of the femur

The equation of mechanical motion of the femur under the influence of the protractor and retractor muscles reads:

$$\ddot{\alpha} = c_4 \sin \alpha \left( \frac{F_R}{l_R} - \frac{F_P}{l_P} \right) - c_5 \dot{\alpha} \quad (1)$$

In this eqn.,  $\alpha(t)$  is the retraction angle of the femur,  $l_P$  and  $l_R$  are the actual lengths of the protractor and retractor muscle, respectively.  $F_P$  and  $F_R$  are contraction forces in the protractor and retractor muscle, respectively.  $c_4$  and  $c_5$  are constants with  $c_5$  expressing the extent of damping (viscosity) in the system. The contraction forces  $F_P$  and  $F_R$  are nonlinear elastic forces of the form [1]:

$$F_P = k_P (l_P - l_{Pmin})^2 \quad (2)$$

$$F_R = k_R (l_R - l_{Rmin})^2 \quad (3)$$

where  $k_P$  and  $k_R$  are the spring constants, and  $l_{Pmin}$  and  $l_{Rmin}$  the minimal lengths of the respective muscles. For a detailed explanation see [2].

## References

1. Guschlbauer Ch, Scharstein H, Büschges A (2007) The extensor tibiae muscle of the stick insect: biomechanical properties of an insect walking leg muscle. *J Exp Biol* 210: 1092-1108.
2. Tóth TI, Knops S, Gruhn S (2012) A neuro-mechanical model explaining forward and backward stepping in the stick insect. *J Neurophysiol* 107: 3267-3280.
